# Supplementary material for: Can sliding-window correlations reveal dynamic functional connectivity in resting-state fMRI?
Source: PubMed Central journal article supplement — Neuroimage. 2016 Feb 15;127:242–56. doi: 10.1016/j.neuroimage.2015.11.055 (PMC4758830; doi:10.1016/j.neuroimage.2015.11.055), 2016-02-15
Supplement: mmc2.pdf [file mmc2.pdf]

# Supplementary Figure 2

A

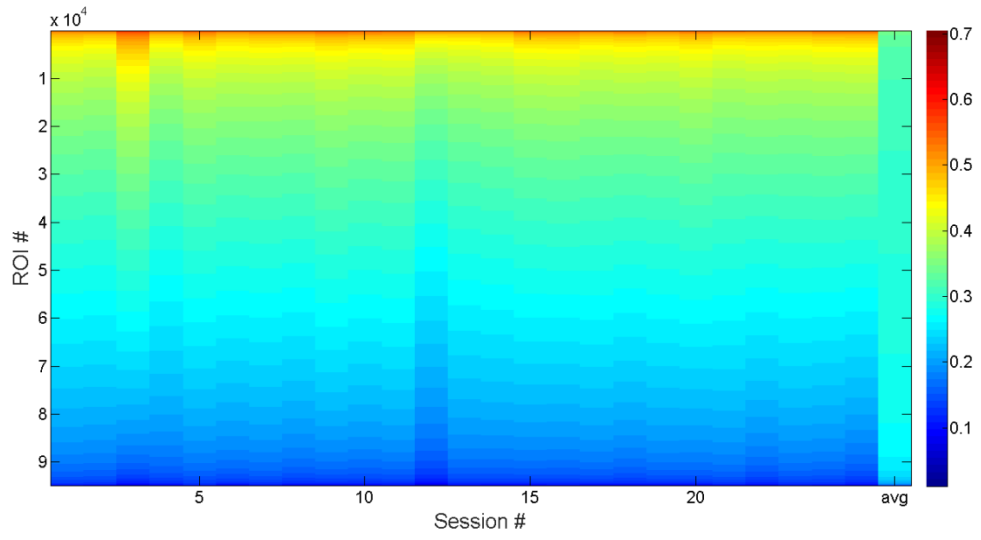

B

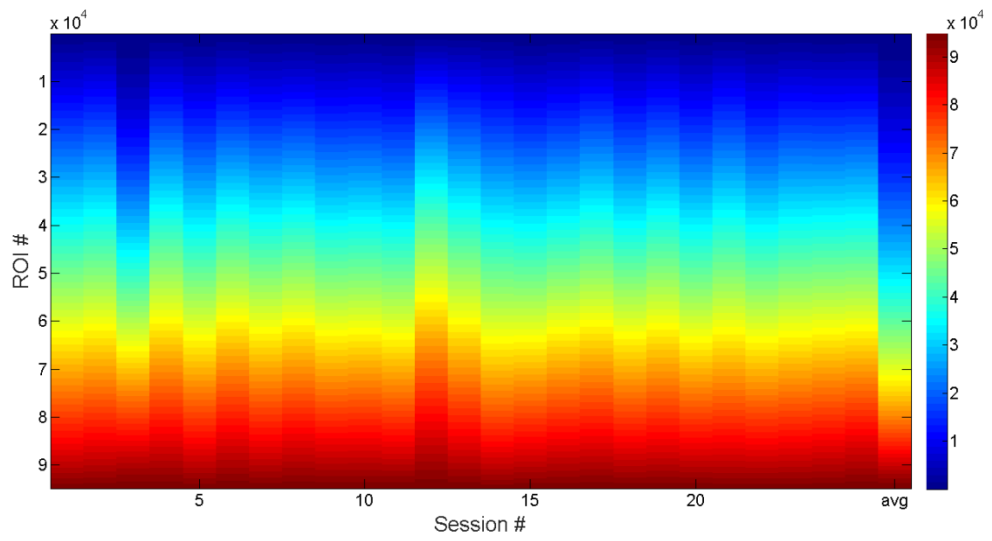

C

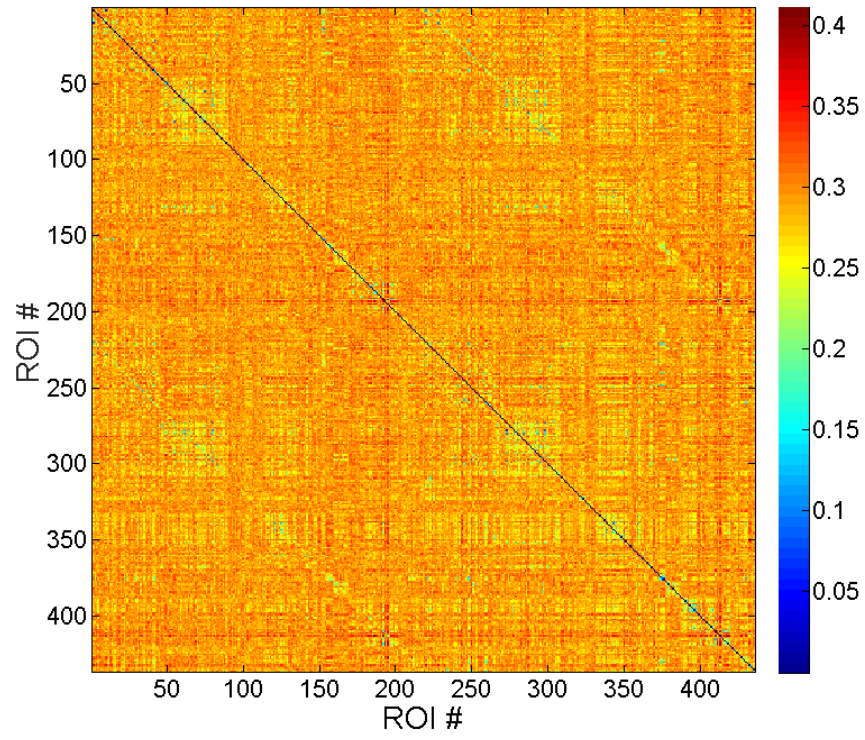

D

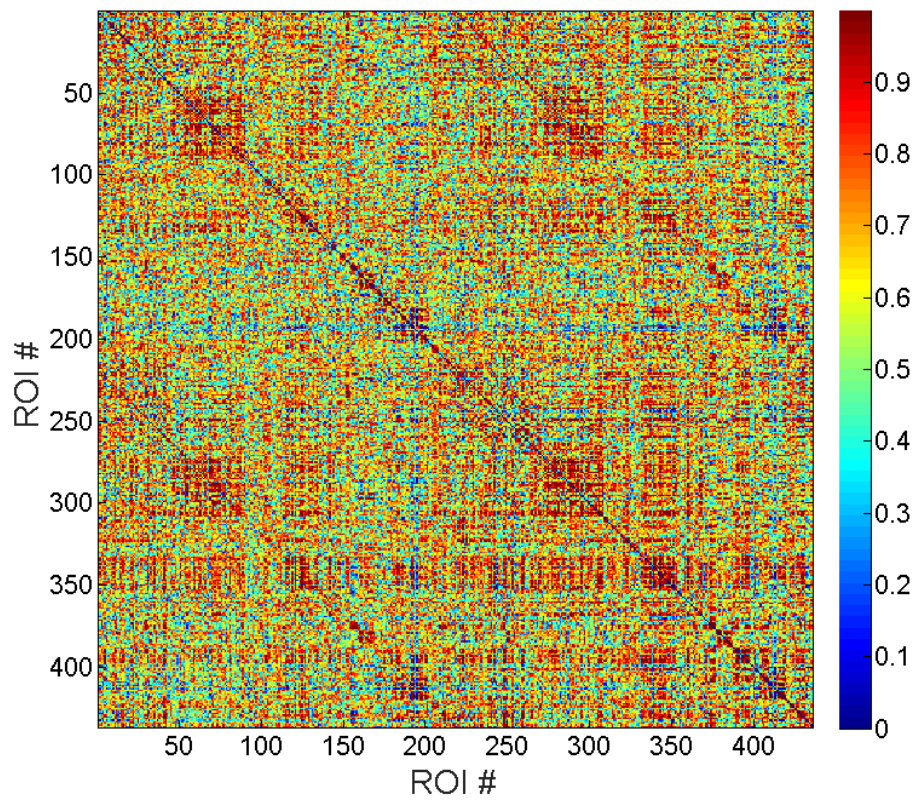

**Pairwise dynamic functional correlations in macaque monkey under general anesthesia (Subject 3).** A: Test-statistic values for all 94830 ROI-pairs, obtained individually for each of the 25 sessions and averaged across all sessions (final column). B: p-values corresponding to test-statistic values in A, corrected for multiple comparisons using the Bonferroni correction. Uncorrected p-values were obtained by comparing the observed values of the test-statistics with those obtained from 250 pairs of surrogate time-series. In panels A and B, ROI-pairs are arranged in ascending order of (Bonferroni corrected) p-values. This is done for each individual session as well as for the average. C: Values of the test-statistics between every ROI-pair, averaged across all 25 sessions. D: p-values corresponding to the session-averaged test-statistic values in C, corrected for multiple comparisons using false discovery rate.
