# Supplementary material for: Can sliding-window correlations reveal dynamic functional connectivity in resting-state fMRI?
Source: PubMed Central journal article supplement — Neuroimage. 2016 Feb 15;127:242–56. doi: 10.1016/j.neuroimage.2015.11.055 (PMC4758830; doi:10.1016/j.neuroimage.2015.11.055), 2016-02-15
Supplement: mmc3.pdf [file mmc3.pdf]

# Supplementary Figure 3

A

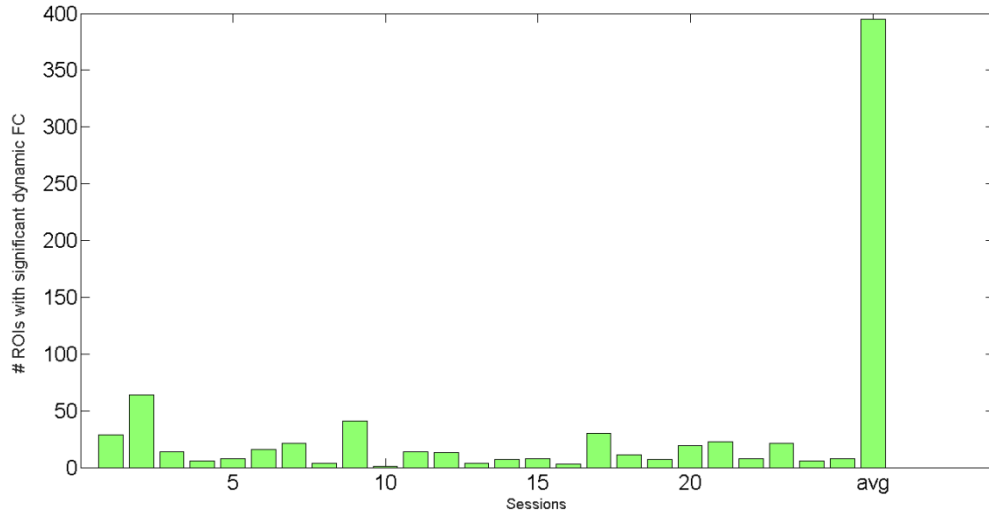

B

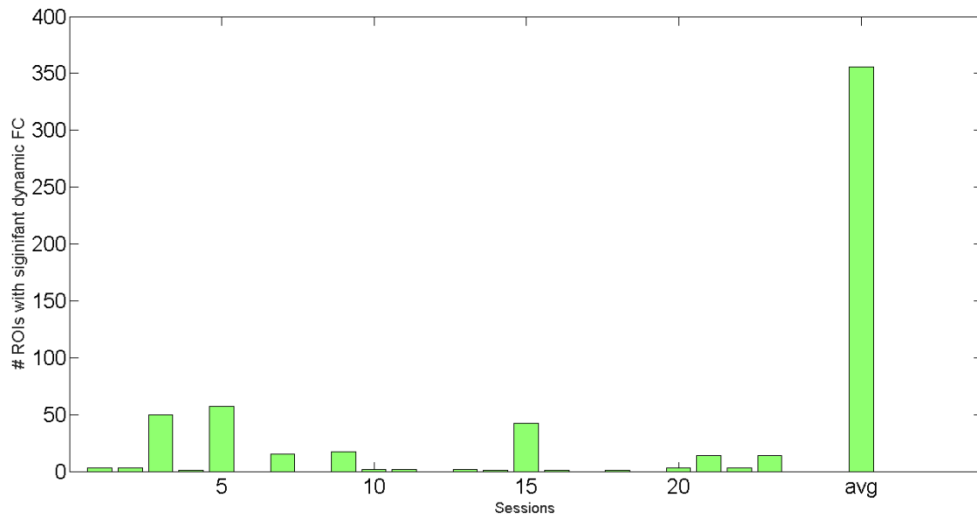

Shown are the number of ROIs with statistically significant (at a confidence level of 95 %) dynamic FC (as measured by the linear test-statistic) calculated for each individual session as well as averaged across sessions. Panels A and B correspond to macaque subjects 2 and 3, respectively.
