# Supplementary material for: Can sliding-window correlations reveal dynamic functional connectivity in resting-state fMRI?
Source: PubMed Central journal article supplement — Neuroimage. 2016 Feb 15;127:242–56. doi: 10.1016/j.neuroimage.2015.11.055 (PMC4758830; doi:10.1016/j.neuroimage.2015.11.055), 2016-02-15
Supplement: mmc4.pdf [file mmc4.pdf]

# Supplementary Figure 4

A

**Subject 2**

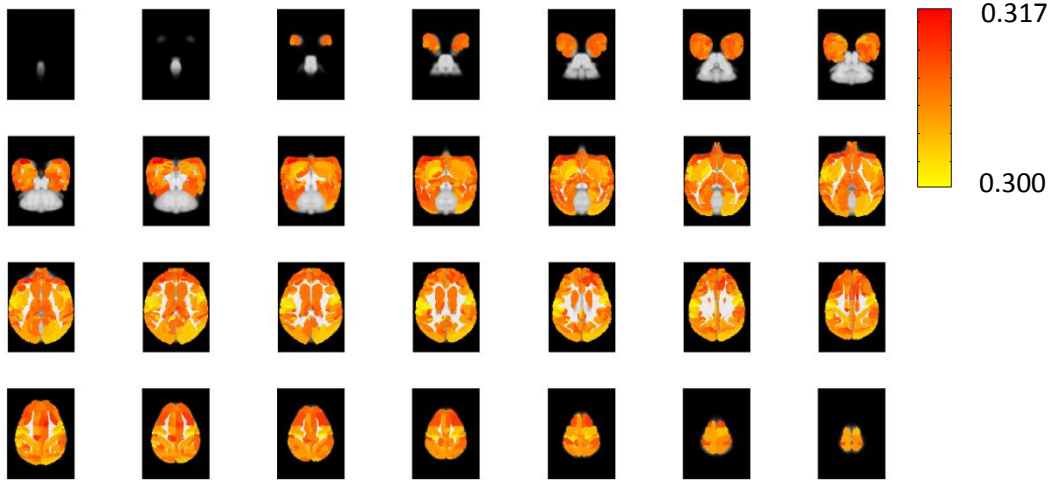

**Subject 3**

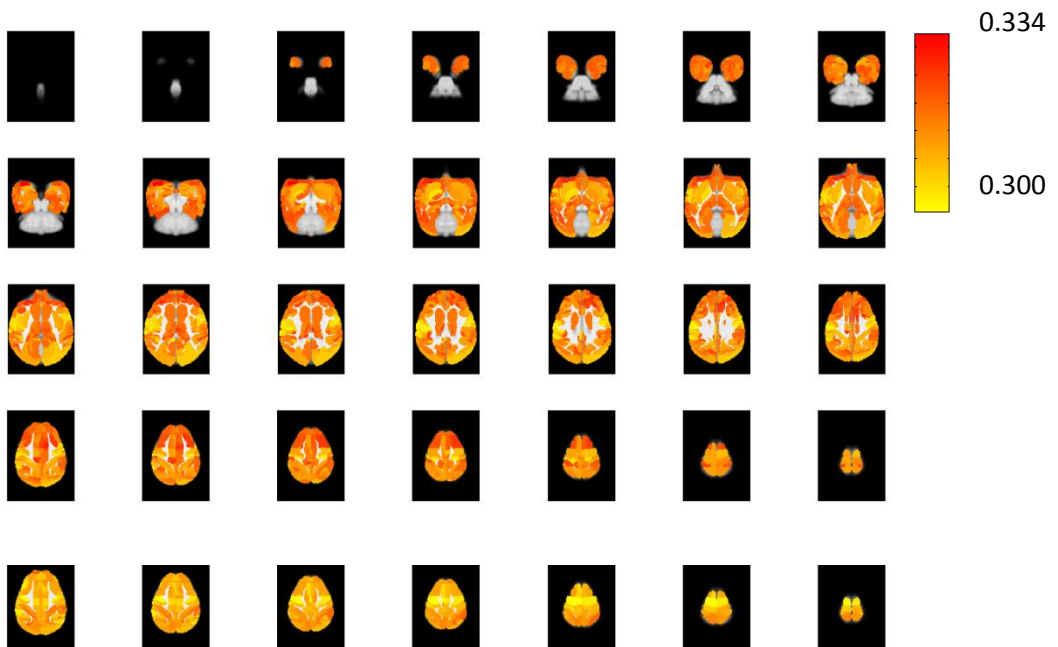

B

Subject 2

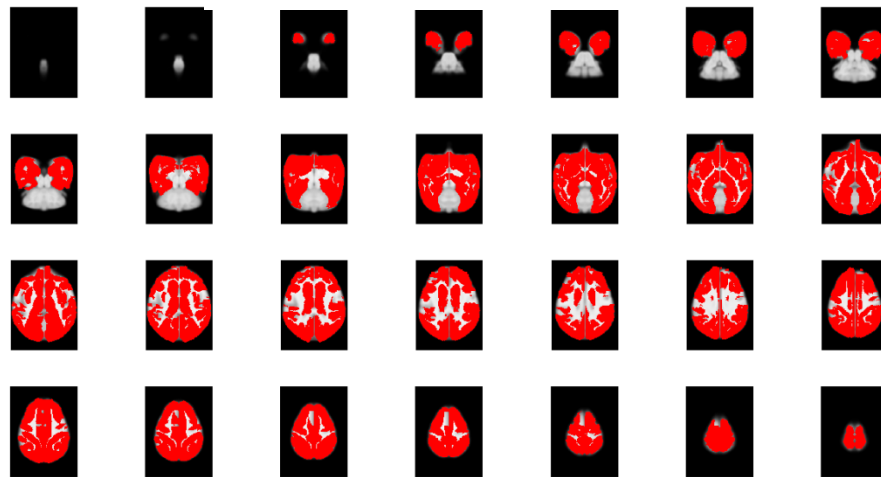

Subject 3

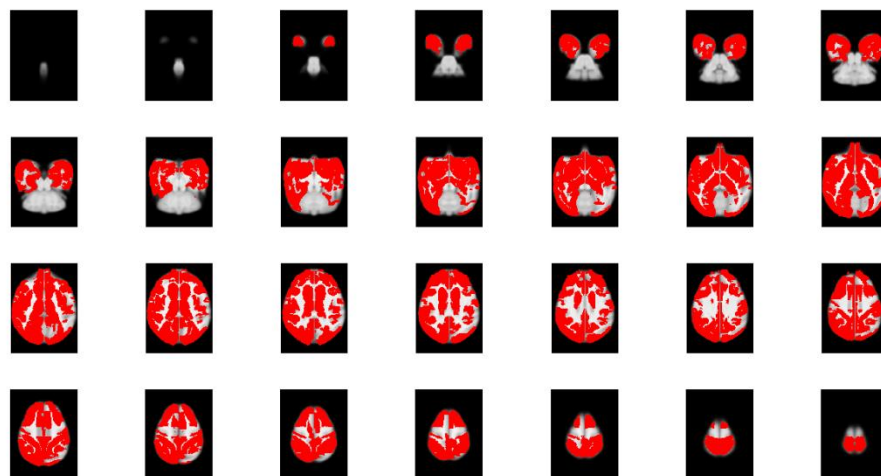

**Session-averaged dynamic functional correlations in macaque monkey under general anesthesia (subjects 2 and 3).** A: ROI-averaged values of the linear  $t$ -statistic displayed color-coded on horizontal slices of the macaque MNI template for subjects 2 and 3. B: Topographic maps showing the spatial distribution of the ROIs displaying statistically significant values ROI-averaged dynamic correlations (in red) for subject 2 and 3.
