# Supplementary material for: Can sliding-window correlations reveal dynamic functional connectivity in resting-state fMRI?
Source: PubMed Central journal article supplement — Neuroimage. 2016 Feb 15;127:242–56. doi: 10.1016/j.neuroimage.2015.11.055 (PMC4758830; doi:10.1016/j.neuroimage.2015.11.055), 2016-02-15
Supplement: mmc5.pdf [file mmc5.pdf]

# Supplementary Figure 5

A

## Linear test-statistic

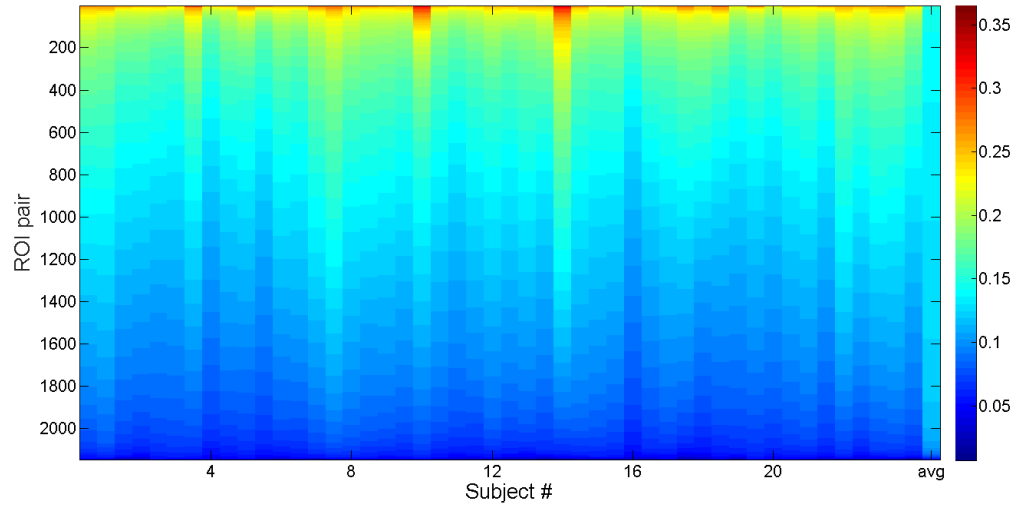

## Non-linear test-statistic

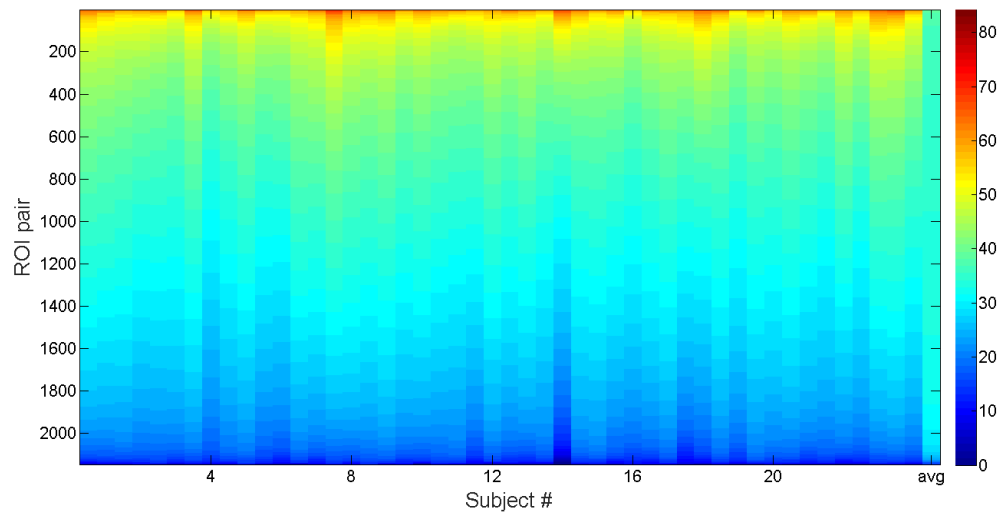

B

### Linear test-statistic

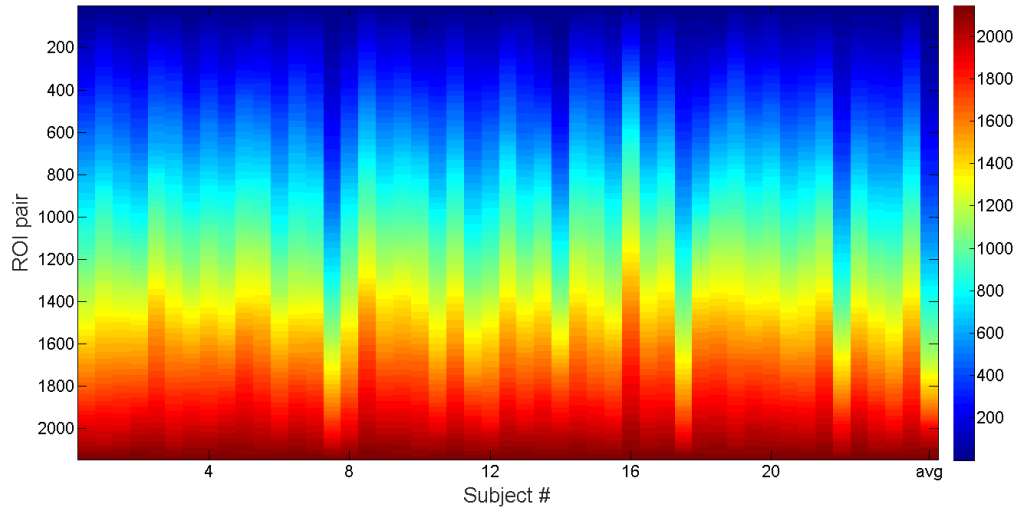

### Non-linear test-statistic

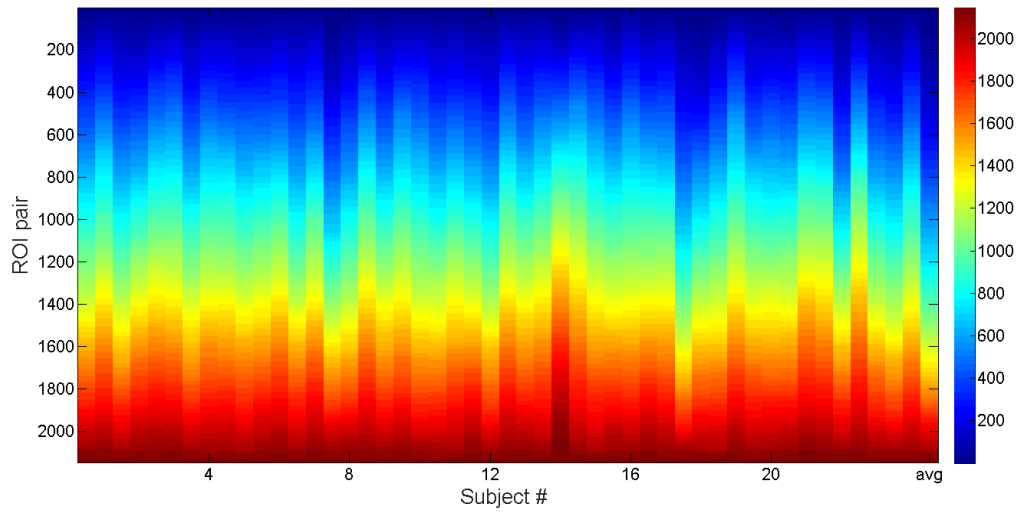

C

Linear test-statistic

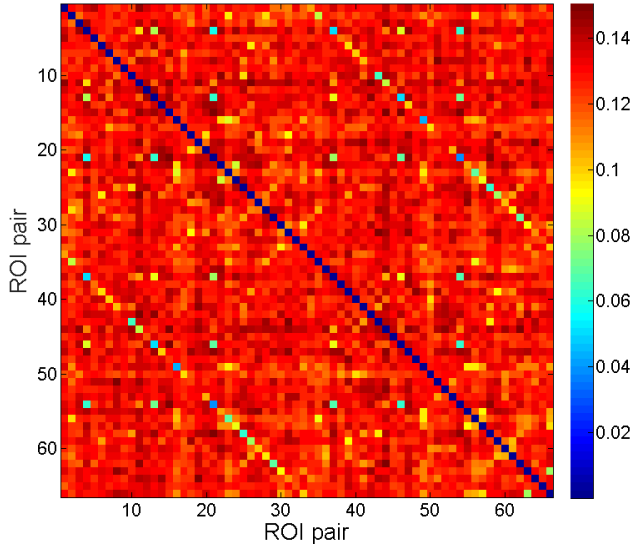

Non-linear test-statistic

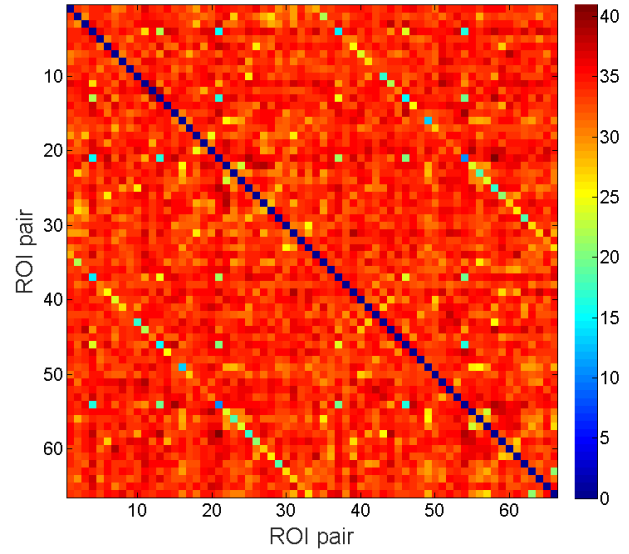

D

Linear test-statistic

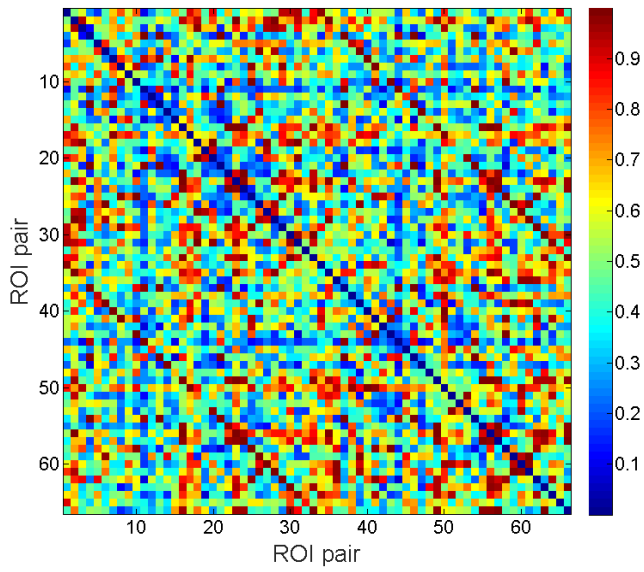

Non-linear test-statistic

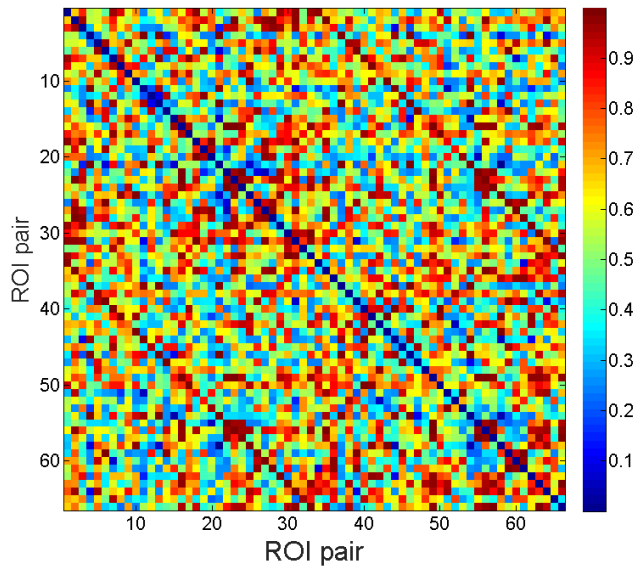

**Pairwise dynamic functional correlations in human resting-state BOLD-fMRI.** **A:** Values of the linear (top panel) and non-linear (bottom panel) test-statistic values for all ROI-pairs, obtained individually for each subject and session and averaged across all subjects and sessions (final column). **B:** p-values corresponding to test-statistic values in A, corrected for multiple comparisons using the Bonferroni correction. Uncorrected p-values were obtained by comparing the observed values of the test-statistics with those obtained from 250 pairs of surrogate time-series. In A and B, ROI-pairs are arranged in ascending order of (Bonferroni corrected) p-values. This is done for each individual subject and session as well as for the average. **C:** Values of the linear (left panel) and non-linear (right panel) test-statistics between every ROI-pair, averaged across all subjects and sessions. **D:** p-values corresponding to the averaged test-statistic values in C, corrected for multiple comparisons using false discovery rate.
